# Supplementary material for: The importance of acid-processed meteoric smoke relative to meteoric fragments for crystal nucleation in polar stratospheric clouds
Source: Copernicus journal article supplement (doi:10.5194/acp-23-2215-2023), 2023-02-14
Supplement: Supplementary file 1 [file acp-23-2215-2023-supplement.zip]

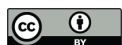

*Supplement of*

**The importance of acid-processed meteoric smoke relative to meteoric fragments for crystal nucleation in polar stratospheric clouds**

**Alexander D. James et al.**

*Correspondence to:* Alexander D. James (a.james1@leeds.ac.uk) and Benjamin J. Murray (b.j.murray@leeds.ac.uk)

- acp-23-2215-2023-supplement-title-page.pdf
- Figure data for James meteoric material PSC.xlsx

The copyright of individual parts of the supplement might differ from the article licence.
