# Supplementary material for: The importance of acid-processed meteoric smoke relative to meteoric fragments for crystal nucleation in polar stratospheric clouds
Source: Copernicus journal article supplement (doi:10.5194/acp-23-2215-2023), 2023-02-14
Supplement: Supplementary file 1 [file Figure data for James meteoric material PSC.xlsx]

## Sheet: Figure 1
	typical atmospheric profiles (volume mixing ratio) of:
altitude / km	H2O / ppbv	HNO3 / ppbv	H2SO4 / ppbv
63.9965	6694.12	3.88545e-07	0.05
56.5508	6620.54	1.25631e-05	0.05
52.6739	6585.65	8.4671e-05	0.05
49.5817	6570.49	0.000552924	0.05
47.0252	6561.02	0.00294	0.05
44.842	6539.82	0.01245	0.05
42.9216	6505.7	0.03837	0.05003
41.1853	6472.3	0.09917	0.05029
39.5737	6446.64	0.43183	0.05211
38.0397	6436.93	1.08269	0.05733
36.5421	6442.11	2.06336	0.06442
35.0531	6442.17	3.44832	0.07054
33.5641	6391.47	5.27146	0.07387
32.0751	6271.14	7.65193	0.07262
30.5861	6090.05	9.74335	0.07086
29.0971	5849.31	9.84499	0.07279
27.6081	5496.51	8.45716	0.0799
26.1191	5069.83	6.99836	0.08931
24.6301	4661.84	5.78718	0.0965
23.141	4370.21	5.03116	0.10319
21.652	4233.4	4.56247	0.11004
20.2019	4279.77	4.40323	0.11376
20.1542	4211.04	4.94305	0.10635
15.6599	3812.32	4.76812	0.07891
13.5244	3577.32	2.82666	0.05839
11.6736	3513.21	0.9929	0.05108
10.0688	3501.94	0.26434	0.05006
8.32182	3500.06	0.05906	0.05
6.29361	3500.01	0.01653	0.05
4.28258	3500.01	0.01194	0.05
2.70667	3500.01	0.01192	0.05
1.59172	3500.01	0.01229	0.05

## Sheet: Figure 3a
			Fraction frozen plots
				Controls from James 2018								controls (this work)					annealed allende binary solution						recently ground allende binary solution
			HNO3 / wt %	39.97		40.01		40.02		40.01		41.29		42.65		39.8		40.06		second repeat		third repeat		42.68		42.8		42.9		40.03		second repeat		third repeat		fourth repeat
			H2SO4 / wt %
			Annealed Allende meteorite / wt %															0.051
			Recently ground Allende meteorite / wt %																					0.38		0.38		0.38		0.05
			T / K	fraction frozen	T / K	fraction frozen	T / K	fraction frozen	T / K	fraction frozen	T / K	fraction frozen	T / K	fraction frozen	T / K	fraction frozen	T / K	fraction frozen	T / K	fraction frozen	T / K	fraction frozen	T / K	fraction frozen	T / K	fraction frozen	T / K	fraction frozen	T / K	fraction frozen	T / K	fraction frozen	T / K	fraction frozen	T / K	fraction frozen
			190.37	0.03226	194.97	0.03226	190.42	0.03448	194.3	0.03571	195.75	0.03571	186.95	0.32143	188.2	0.03846	209.45	0.03226	208.55	0.02857	204.95	0.02703	206.1	0.05	208.35	0.03333	210.15	0.04	205.35	0.02857	202.75	0.02703	207.35	0.03448	206.75	0.025
			189.16	0.06452	194.95	0.06452	190.04	0.06897	194.24	0.07143	195.45	0.07143	186.85	0.35714	187.2	0.07692	208.55	0.06452	207.45	0.05714	204.45	0.05405	205.5	0.1	206.45	0.06667	209.15	0.08	205.25	0.05714	201.45	0.05405	205.15	0.06897	202.55	0.05
			188.96	0.09677	189.73	0.09677	188.9	0.10345	192.69	0.10714	194.75	0.10714	186.75	0.39286	186.9	0.11538	207.05	0.09677	205.65	0.08571	203.45	0.08108	203.9	0.15	205.85	0.1	203.45	0.12	204.65	0.08571	201.45	0.08108	204.15	0.10345	199.65	0.075
			188.5	0.12903	189.29	0.12903	188.83	0.13793	190.69	0.14286	194.35	0.14286	186.45	0.42857	186.8	0.15385	206.65	0.12903	203.85	0.11429	203.25	0.10811	203.6	0.2	205.85	0.13333	203.35	0.16	203.45	0.11429	200.75	0.10811	202.45	0.13793	198.15	0.1
			188.47	0.16129	189.27	0.16129	188.72	0.17241	190.28	0.17857	193.65	0.17857	185.55	0.46429	186.8	0.19231	205.65	0.16129	203.65	0.14286	203.15	0.13514	203.5	0.25	205.45	0.16667	203.15	0.2	202.55	0.14286	200.55	0.13514	200.05	0.17241	196.85	0.125
			188.22	0.19355	189.26	0.19355	188.37	0.2069	189.27	0.21429	192.05	0.21429	185.25	0.5	186.5	0.23077	205.15	0.19355	203.45	0.17143	203.05	0.16216	203.4	0.3	205.05	0.2	202.15	0.24	202.35	0.17143	198.75	0.16216	199.15	0.2069	196.75	0.15
			188.18	0.22581	189.15	0.22581	187.71	0.24138	189.2	0.25	191.45	0.25	184.85	0.53571	186.1	0.26923	205.15	0.22581	203.15	0.2	202.85	0.18919	202.6	0.35	205.05	0.23333	201.65	0.28	201.85	0.2	198.25	0.18919	198.15	0.24138	196.35	0.175
			187.72	0.25806	188.77	0.25806	187.63	0.27586	188.37	0.28571	189.75	0.28571	184.85	0.57143	186.1	0.30769	205.05	0.25806	203.15	0.22857	202.85	0.21622	202.4	0.4	204.05	0.26667	201.15	0.32	201.15	0.22857	198.05	0.21622	197.45	0.27586	195.85	0.2
			187.22	0.29032	188.67	0.29032	187.52	0.31034	188.04	0.32143	189.35	0.32143	184.65	0.60714	184.6	0.34615	204.65	0.29032	202.35	0.25714	202.35	0.24324	201.3	0.45	203.35	0.3	200.65	0.36	201.05	0.25714	197.85	0.24324	196.75	0.31034	194.95	0.225
			187.12	0.32258	188.18	0.32258	187.47	0.34483	188.01	0.35714	188.85	0.35714	183.95	0.64286	184.2	0.38462	204.45	0.32258	202.35	0.28571	201.95	0.27027	201.1	0.5	202.35	0.33333	200.65	0.4	200.85	0.28571	197.75	0.27027	195.85	0.34483	194.75	0.25
			186.84	0.35484	187.53	0.35484	187.36	0.37931	187.72	0.39286	187.85	0.39286	182.85	0.67857	183.8	0.42308	204.05	0.35484	200.45	0.31429	201.35	0.2973	200.6	0.55	201.95	0.36667	200.55	0.44	200.15	0.31429	197.75	0.2973	194.05	0.37931	194.05	0.275
			186.29	0.3871	187.28	0.3871	187.2	0.41379	187.13	0.42857	187.35	0.42857	182.65	0.71429	183.3	0.46154	203.45	0.3871	200.35	0.34286	201.35	0.32432	200.4	0.6	200.65	0.4	200.25	0.48	199.65	0.34286	197.45	0.32432	190.25	0.41379	192.85	0.3
			186.27	0.41935	187.13	0.41935	186.86	0.44828	187.03	0.46429	187.15	0.46429	182.45	0.75	182.9	0.5	203.45	0.41935	199.95	0.37143	201.15	0.35135	200.3	0.65	200.35	0.43333	199.95	0.52	199.15	0.37143	196.85	0.35135	189.95	0.44828	191.85	0.325
			186.16	0.45161	186.54	0.45161	186.51	0.48276	186.66	0.5	187.15	0.5	182.35	0.78571	182.5	0.53846	203.35	0.45161	199.95	0.4	200.85	0.37838	200.2	0.7	200.05	0.46667	199.55	0.56	198.95	0.4	196.45	0.37838	189.75	0.48276	191.05	0.35
			186.07	0.48387	186.24	0.48387	186.43	0.51724	186.6	0.53571	187.05	0.53571	181.85	0.82143	180	0.57692	202.55	0.48387	199.85	0.42857	200.65	0.40541	199.2	0.75	199.95	0.5	199.45	0.6	198.95	0.42857	196.05	0.40541	189.65	0.51724	190.15	0.375
			185.78	0.51613	185.95	0.51613	185.95	0.55172	185.69	0.57143	187.05	0.57143	181.35	0.85714	179.9	0.61538	202.45	0.51613	199.85	0.45714	200.55	0.43243	199.1	0.8	199.85	0.53333	199.15	0.64	198.35	0.45714	195.65	0.43243	189.35	0.55172	188.95	0.4
			185.53	0.54839	185.9	0.54839	185.63	0.58621	185.58	0.60714	186.35	0.60714	179.95	0.89286	179.9	0.65385	201.65	0.54839	199.85	0.48571	200.25	0.45946	198.8	0.85	199.05	0.56667	198.55	0.68	197.95	0.48571	195.05	0.45946	189.15	0.58621	188.85	0.425
			185.38	0.58065	185.46	0.58065	185.54	0.62069	184.76	0.64286	186.05	0.64286	179.25	0.92857	179.8	0.69231	201.25	0.58065	198.85	0.51429	199.95	0.48649	196.9	0.9	198.95	0.6	198.45	0.72	197.75	0.51429	194.05	0.48649	188.95	0.62069	188.65	0.45
			184.9	0.6129	185.05	0.6129	185.35	0.65517	184.65	0.67857	184.85	0.67857	178.15	0.96429	178.8	0.73077	200.95	0.6129	198.15	0.54286	199.35	0.51351	196.5	0.95	198.85	0.63333	198.25	0.76	197.35	0.54286	193.65	0.51351	188.75	0.65517	186.95	0.475
			183.21	0.64516	184.66	0.64516	185.05	0.68966	184.51	0.71429	184.75	0.71429	176.15	1	177.7	0.76923	200.85	0.64516	198.15	0.57143	198.85	0.54054	194.7	1	198.85	0.66667	197.75	0.8	196.55	0.57143	193.55	0.54054	188.65	0.68966	186.75	0.5
					183.47	0.67742	184.62	0.72414	183.89	0.75	184.05	0.75			177.2	0.80769	199.95	0.67742	197.05	0.6	198.85	0.56757			198.15	0.7	196.15	0.84	195.05	0.6	192.15	0.56757	187.95	0.72414	186.55	0.525
					183.24	0.70968	184.45	0.75862	183.56	0.78571	183.75	0.78571			176.8	0.84615	199.55	0.70968	196.55	0.62857	197.95	0.59459			196.85	0.73333	196.15	0.88	194.85	0.62857	191.65	0.59459	187.85	0.75862	185.55	0.55
					183.17	0.74194	183.41	0.7931	183.37	0.82143	183.55	0.82143			176.1	0.88462	199.55	0.74194	196.25	0.65714	197.95	0.62162			196.95	0.76667	196.15	0.92	194.75	0.65714	191.65	0.62162	186.85	0.7931	184.75	0.575
							183.27	0.82759			183.45	0.85714			175.6	0.92308	199.25	0.77419	195.65	0.68571	197.85	0.64865			196.65	0.8	193.95	0.96	193.15	0.68571	191.25	0.64865	186.25	0.82759	184.55	0.6
											183.05	0.89286					197.95	0.80645	195.25	0.71429	197.35	0.67568			196.55	0.83333	190.65	1	191.15	0.71429	190.05	0.67568	184.55	0.86207	183.85	0.625
											182.85	0.92857					196.75	0.83871	194.75	0.74286	197.25	0.7027			196.15	0.86667			191.05	0.74286	189.45	0.7027	182.75	0.89655	183.75	0.65
											182.05	0.96429					196.15	0.87097	194.45	0.77143	196.95	0.72973			195.75	0.9			189.75	0.77143	189.15	0.72973	182.65	0.93103	183.25	0.675
											180.75	1					195.45	0.90323	194.25	0.8	196.85	0.75676			195.65	0.93333			186.65	0.8	189.15	0.75676	182.15	0.96552	182.85	0.7
																	195.35	0.93548	193.95	0.82857	195.45	0.78378			194.75	0.96667			186.35	0.82857	188.65	0.78378	178.65	1	182.85	0.725
																	194.45	0.96774	193.15	0.85714	195.35	0.81081			194.25	1			185.35	0.85714	187.35	0.81081			182.45	0.75
																	194.45	1	192.35	0.88571	194.95	0.83784							184.55	0.88571	185.95	0.83784			182.25	0.775
																			191.05	0.91429	194.25	0.86486							184.05	0.91429	185.15	0.86486			181.65	0.8
																			189.95	0.94286	193.85	0.89189							183.05	0.94286	184.95	0.89189			181.65	0.825
																			187.75	0.97143	185.55	0.91892							182.75	0.97143	184.75	0.91892			180.35	0.85
																			183.05	1	182.45	0.94595							182.15	1	183.35	0.94595			179.95	0.875
																					179.85	0.97297									180.55	0.97297			179.95	0.9
																					179.85	1									180.45	1			179.35	0.925
																																			179.05	0.95
																																			178.15	0.975
																																			177.35	1

## Sheet: Figure 3b
			fraction frozen plots
				recenty ground allende ternary solution
			HNO3 / wt %	43.01		second repeat		43.4		second repeat		third repeat		43		second repeat		39.97		second repeat		third repeat
			H2SO4 / wt %	0.5				0.5						0.5				0.44
			Annealed Allende meteorite / wt %
			Recently ground Allende meteorite / wt %	0.37				0.04						0.37				0.05
			T / K	fraction frozen
			207	0.03125	196.7	0.0303	193.8	0.0303	201.5	0.03125	195.4	0.02778	194.4	0.03226	202.1	0.02941	198.25	0.02703	197.05	0.03125	202.05	0.02857
			202.8	0.0625	196.7	0.06061	193.1	0.06061	197.9	0.0625	195.1	0.05556	191.6	0.06452	198.8	0.05882	196.15	0.05405	196.65	0.0625	190.75	0.05714
			202.1	0.09375	195	0.09091	192.6	0.09091	197.9	0.09375	194.7	0.08333	191.3	0.09677	194.8	0.08824	195.95	0.08108	196.05	0.09375	189.35	0.08571
			202.1	0.125	194.9	0.12121	191.5	0.12121	195.3	0.125	194.6	0.11111	191.2	0.12903	194.6	0.11765	194.65	0.10811	195.85	0.125	188.95	0.11429
			201.8	0.15625	194.6	0.15152	190.7	0.15152	194.6	0.15625	194.5	0.13889	190.6	0.16129	193.9	0.14706	194.15	0.13514	195.35	0.15625	188.65	0.14286
			198.3	0.1875	194.3	0.18182	190.6	0.18182	194.2	0.1875	194.5	0.16667	190.6	0.19355	193.2	0.17647	194.15	0.16216	195.95	0.1875	187.75	0.17143
			197.6	0.21875	194.1	0.21212	189.9	0.21212	193.7	0.21875	194.4	0.19444	190.2	0.22581	193	0.20588	194.15	0.18919	195.05	0.21875	187.25	0.2
			195.5	0.25	193.7	0.24242	189.5	0.24242	193.3	0.25	194.3	0.22222	190.2	0.25806	191.6	0.23529	193.25	0.21622	194.75	0.25	185.05	0.22857
			195.3	0.28125	193.2	0.27273	189.5	0.27273	193.2	0.28125	194.4	0.25	190.3	0.29032	191.6	0.26471	193.05	0.24324	194.45	0.28125	184.55	0.25714
			194.8	0.3125	192.9	0.30303	189.3	0.30303	193.1	0.3125	194	0.27778	191.1	0.32258	191.6	0.29412	192.45	0.27027	192.95	0.3125	183.65	0.28571
			194.5	0.34375	192.9	0.33333	188.7	0.33333	192.9	0.34375	193.6	0.30556	190	0.35484	191.5	0.32353	191.95	0.2973	193.35	0.34375	182.35	0.31429
			193.7	0.375	192.9	0.36364	188.9	0.36364	192.9	0.375	193.2	0.33333	189.7	0.3871	190.3	0.35294	191.75	0.32432	192.35	0.375	182.05	0.34286
			193.7	0.40625	192.9	0.39394	188.4	0.39394	192.8	0.40625	193.1	0.36111	189.5	0.41935	189.9	0.38235	191.15	0.35135	192.15	0.40625	181.95	0.37143
			193.1	0.4375	192.5	0.42424	188.5	0.42424	192.7	0.4375	193.1	0.38889	189.4	0.45161	189.7	0.41176	190.65	0.37838	191.05	0.4375	180.75	0.4
			192.9	0.46875	192.4	0.45455	188.1	0.45455	192.6	0.46875	192.8	0.41667	189.4	0.48387	189.6	0.44118	190.45	0.40541	190.35	0.46875	180.45	0.42857
			192.4	0.5	192	0.48485	187.7	0.48485	192.5	0.5	192.6	0.44444	189.1	0.51613	189.5	0.47059	190.45	0.43243	189.65	0.5	180.35	0.45714
			192.5	0.53125	191.9	0.51515	187.6	0.51515	192.1	0.53125	192.6	0.47222	188.8	0.54839	189.1	0.5	190.25	0.45946	189.05	0.53125	180.25	0.48571
			192.3	0.5625	191.9	0.54545	187.6	0.54545	192	0.5625	192	0.5	188.7	0.58065	189	0.52941	189.95	0.48649	189.05	0.5625	179.75	0.51429
			192.1	0.59375	191.8	0.57576	187.7	0.57576	191.7	0.59375	192.1	0.52778	188.7	0.6129	188.8	0.55882	189.75	0.51351	188.85	0.59375	179.55	0.54286
			191.6	0.625	191.6	0.60606	187.1	0.60606	191.7	0.625	191.3	0.55556	188.4	0.64516	188.7	0.58824	189.55	0.54054	188.85	0.625	179.35	0.57143
			191	0.65625	191.6	0.63636	187.2	0.63636	191.4	0.65625	190.1	0.58333	187.9	0.67742	188.1	0.61765	189.35	0.56757	188.55	0.65625	179.15	0.6
			191.1	0.6875	191.6	0.66667	186.7	0.66667	191.4	0.6875	189.7	0.61111	187.4	0.70968	188	0.64706	189.25	0.59459	188.45	0.6875	178.55	0.62857
			191.1	0.71875	191.2	0.69697	186.4	0.69697	191.3	0.71875	189.3	0.63889	187.5	0.74194	188.2	0.67647	186.75	0.62162	188.45	0.71875	178.25	0.65714
			190.6	0.75	191	0.72727	185.9	0.72727	191.3	0.75	189.1	0.66667	187.1	0.77419	188.1	0.70588	186.25	0.64865	186.95	0.75	177.95	0.68571
			190.6	0.78125	190.6	0.75758	185.7	0.75758	190.7	0.78125	188.7	0.69444	186.7	0.80645	187.7	0.73529	186.15	0.67568	185.35	0.78125	177.55	0.71429
			190.3	0.8125	189.8	0.78788	185.5	0.78788	190.3	0.8125	187.6	0.72222	186.6	0.83871	187.3	0.76471	185.85	0.7027	184.75	0.8125	176.75	0.74286
			188.9	0.84375	189	0.81818	185.3	0.81818	189.6	0.84375	187.3	0.75	185.6	0.87097	187.2	0.79412	184.65	0.72973	184.35	0.84375	176.35	0.77143
			188.9	0.875	188.8	0.84848	184.3	0.84848	189.5	0.875	187.2	0.77778	185.4	0.90323	187	0.82353	183.95	0.75676	183.25	0.875	176.25	0.8
			189	0.90625	188.7	0.87879	184.1	0.87879	188.1	0.90625	186.7	0.80556	185	0.93548	186.7	0.85294	183.65	0.78378	182.65	0.90625	176.05	0.82857
			187	0.9375	188.6	0.90909	183.6	0.90909	187.8	0.9375	186.3	0.83333	184.7	0.96774	186.7	0.88235	183.35	0.81081	179.55	0.9375	175.15	0.85714
			186.7	0.96875	188.4	0.93939	183.4	0.93939	187.6	0.96875	186.2	0.86111	183.9	1	186	0.91176	181.75	0.83784	178.35	0.96875
			185.3	1	186.3	0.9697	182.4	0.9697	186.8	1	185.7	0.88889			185.4	0.94118	180.65	0.86486	176.65	1
					184.1	1	182.3	1			184.9	0.91667			185.1	0.97059	180.65	0.89189
											184.5	0.94444			184.9	1	178.95	0.91892
											183.7	0.97222
											183.2	1

## Sheet: Figure 4
	ns vs SNAT
				James 2018 meteorite samples											This study recently ground allende										this study annealed allende
			HNO3 / wt %	39.99		40		39.98		39.95		39.96		40		42.6		second repeat		third repeat		41.33		second repeat		39.9		second repeat		third repeat		40		second repeat		third repeat
			H2SO4 / wt %													0.5						0.48				0.5
			Annealed Allende meteorite / wt %																							0.05						0.05
			Recently ground Allende meteorite / wt %									0.044		0.043		0.04						0.06
			NWA 4502 meteorite / wt %	0.042		0.033
			Chergach meteorite / wt %					0.045		0.045
			SNAT	ns / cm-2	SNAT	ns / cm-2	SNAT	ns / cm-2	SNAT	ns / cm-2	SNAT	ns / cm-2	SNAT	ns / cm-2
			5.30504	1.10398	5.60386	1.40507	7.43866	13.3482	8.50468	12.9243	7.02142	4.77	8.41328	5.39	15.7742	1.00255	11.2929	1.03438	14.637	0.91781	10.293	0.81486	15.6696	1.01368	4.8145	2.15461	7.30764	2.46692	7.49492	2.33173	5.59893	2.7905	5.86753	2.46692	7.043	2.33173
			6.98482	2.24539	5.90876	2.85778	8.87703	27.1489	10.3903	26.2725	10.2573	9.69	9.86154	11	16.2883	2.03693	13.4863	2.10268	14.8489	1.86223	10.4987	1.66299	17.2456	2.07937	5.90461	4.3652	7.8429	5.00748	7.49492	4.72914	5.97991	5.67561	6.30905	5.00748	7.30781	4.72914
			7.78394	3.42687	7.15557	4.36146	9.58265	41.4339	10.9522	40.0732	11.5668	14.8	11.141	16.8	16.6639	3.10523	13.4863	3.2072	15.1264	2.83485	12.6525	2.54723	17.4027	3.20269	6.09099	6.63474	7.8429	7.62623	7.92213	7.19606	6.43367	8.66198	6.89055	7.62623	7.67362	7.19606
			8.79507	4.65131	7.29713	5.91985	9.5935	56.2385	11.4709	54.3582	12.6112	20.1	11.5657	22.8	17.5187	4.20975	15.272	4.35048	15.2033	3.8374	14.3873	3.47077	17.6942	4.39023	7.46698	8.96646	7.88243	10.3281	8.12323	9.73663	6.56092	11.757	7.52532	10.3281	7.74875	9.73663
			9.48547	5.92197	7.50403	7.53705	10.272	71.602	11.4925	69.1629	13.2984	25.5	12.6165	29.1	18.1498	5.35303	15.7872	5.53535	15.2737	4.87178	15.3935	4.43729	17.8538	5.64979	7.80968	11.3639	8.00205	13.1186	8.45398	12.3554	6.89055	14.9688	7.59914	13.1186	7.78656	12.3554
			10.0182	7.24247	8.09205	9.21768	10.272	87.568	12.4921	84.5263	13.7097	31.2	12.9922	35.6	18.2224	6.5379	16.0788	6.76494	15.2737	5.94008	16.4493	5.45097	17.9962	6.99066	7.8884	13.8308	8.04227	16.0038	8.53839	15.0573	7.06153	18.3066	7.67362	16.0038	7.82454	15.0573
			10.2357	8.61688	8.48406	10.9669	10.9559	104.186	12.5191	100.492	13.9099	37.1	13.2699	42.4	18.7976	7.76749	16.4675	8.04276	15.3373	7.0446	16.9585	6.51666	17.9302	8.42408	8.36911	16.3714	8.70929	18.9901	8.66631	17.8478	6.97146	21.7806	7.70152	18.9901	7.80909	17.8478
			10.589	10.0498	8.58206	12.7906	11.5747	121.511	12.9621	117.11	14.267	43.2	13.4822	49.6	19.1319	9.04531	16.7698	9.37275	15.3373	8.18788	17.4027	7.63998	18.3892	9.96377	9.04872	18.9901	8.83928	22.0851	9.01502	20.7329	7.09622	25.4026	7.78656	22.0851	7.90099	20.7329
			10.6216	11.5464	8.82707	14.6954	13.0456	139.607	13.2215	134.435	14.6296	49.6	13.8143	57.1	19.1319	10.3753	16.8493	10.7593	15.4083	9.37275	17.8538	8.82752	18.3892	11.6268	9.72466	21.692	9.55884	25.2969	9.14864	23.7192	7.23663	29.1855	8.09499	25.2969	8.09499	23.7192
			10.6706	13.1127	8.86518	16.6889	13.1596	158.544	13.2539	152.531	14.6675	56.3	13.8415	65	19.3004	11.7619	16.9297	12.2076	15.6298	10.6023	17.9962	10.0871	18.4669	13.4345	10.0016	24.4825	10.1275	28.6347	9.28382	26.8142	7.30781	33.1445	8.09499	28.6347	8.25314	26.8142
			10.7303	14.7554	9.58387	18.7796	13.5558	178.406	13.9941	171.468	14.8514	63.2	13.8688	73.3	19.6414	13.2102	17.0792	13.7232	15.9197	11.8802	18.3144	11.4279	19.0909	15.4147	10.0481	27.3676	10.176	32.1088	10.031	30.026	7.45216	37.2967	8.86966	32.1088	8.49531	30.026
			10.763	16.4823	9.75265	20.9775	13.8218	199.286	14.113	191.33	14.938	70.6	14.1301	82.1	19.813	14.7258	17.0792	15.3128	16.2141	13.2102	18.3144	12.8614	19.1815	17.6038	10.1433	30.354	10.5205	35.7307	11.6046	33.3638	7.67362	41.6619	8.91208	35.7307	8.49531	33.3638
			11.1109	18.3027	10.21	23.2943	14.104	221.296	14.2048	212.211	15.003	78.3	14.1573	91.4	19.9959	16.3154	17.145	16.984	16.2883	14.5968	18.7789	14.4011	19.3374	20.0509	10.1913	33.449	11.1306	39.5136	11.7118	36.8379	7.67362	46.2631	9.08339	39.5136	8.57735	36.8379
			11.2414	20.2271	10.6673	25.7436	14.4351	244.564	14.3237	234.22	15.0192	86.4	14.4187	101	20.0826	17.9865	17.2266	18.7455	16.2883	16.045	18.9332	16.0641	20.2275	22.8252	10.2394	36.6608	11.7118	43.4726	11.7657	40.4598	7.7111	51.1275	9.08339	43.4726	8.70164	40.4598
			11.2522	22.2683	11.288	28.3414	15.1244	269.243	14.9451	257.489	15.1166	95	14.8433	112	20.3349	19.748	17.3085	20.6077	16.5205	17.5606	19.3374	17.8718	20.15	26.0278	10.4864	39.9986	12.3139	47.6248	11.9284	44.2428	7.92914	56.2868	9.12663	47.6248	8.78532	44.2428
			11.7469	24.4412	11.3098	31.1069	15.1299	295.516	14.9667	282.168	15.2248	104	14.9413	123	20.6868	21.6103	17.3907	22.5829	16.6639	19.1502	19.746	19.852	20.15	29.8158	10.5358	43.4726	13.4622	51.99	12.8794	48.2018	8.05586	61.7792	9.0364	51.99	8.73484	48.2018
			11.8393	26.7641	11.3915	34.0633	15.6129	323.602	15.2963	308.44	15.2519	114	14.9577	136	20.6868	23.5855	17.7067	24.6856	16.6639	20.8214	20.0688	22.041	20.5664	34.4519	10.8295	47.0946	13.6404	56.5913	12.9946	52.3539	8.37349	67.6506	9.12663	56.5913	8.95466	52.3539
			11.8502	29.2592	11.5058	37.2389	15.8138	353.77	15.3611	336.526	15.5495	124	15.0339	149	20.7753	25.6881	17.7821	26.9334	17.0544	22.5829	20.2275	24.4881	20.7394	40.4289	10.8802	50.8775	13.7601	61.4556	13.3443	56.7191	8.53625	73.9574	9.56805	61.4556	9.08339	56.7191
			11.8502	31.9541	11.8162	40.6688	15.9223	386.354	15.4854	366.694	15.8525	135	15.1374	164	20.7753	27.9359	18.0354	29.3478	17.132	24.4451	20.5664	27.2624	20.8084	48.853	10.987	54.8365	13.8804	66.6149	13.6404	61.3204	8.66005	80.7693	9.88683	66.6149	9.34528	61.3204
			11.9535	34.8836	12.023	44.3973	16.0418	421.774	15.5556	399.278	16.0257	147	15.1755	180	21.1332	30.3504	18.0354	31.9556	17.6604	26.4203	20.7394	30.4651	21.2298	63.254	11.1405	58.9887	14.3071	72.1073	13.6404	66.1847	8.70164	88.1742	9.88683	72.1073	9.56805	66.1847
			12.0024	38.0926	12.4641	48.4814	16.0852	460.574	15.6528	434.699	16.0744	160	15.2081	198	21.2228	32.9582	18.2829	34.7905	18.6407	28.523	21.585	34.2531			11.3485	63.3539	14.6171	77.9788	14.0622	71.344	9.08339	96.2853	10.404	77.9788	9.56805	71.344
			12.0242	41.6399	12.4749	52.9962	16.286	503.464	15.95	473.498	16.1014	175	15.709	218	21.584	35.7931	18.2829	37.8957	18.9643	30.7708	21.585	38.8892			11.5014	67.9551	15.3786	84.2856	15.25	76.8364	9.16503	105.252	10.6457	84.2856	9.97939	76.8364
			12.1873	45.6054	12.8288	58.0433	16.3023	551.411	16.2039	516.388	16.3017	190	15.7199	242	21.8688	38.8983	18.3689	41.3284	19.3004	33.1852	21.6541	44.8662			11.7149	72.8195	15.4432	91.0974	15.638	82.7079	9.25733	115.275	10.7927	91.0974	9.97939	82.7079
			12.3829	50.1012	12.8887	63.7652	16.324	605.77	16.2148	564.336	16.4153	208	15.9595	270	22.3176	42.331	18.3689	45.1658	19.4708	35.7931	22.0118	53.2903			12.3162	77.9788	15.9661	98.5023	16.0322	89.0147	9.38951	126.639	10.9877	98.5023	9.93289	89.0147
			12.5406	55.2913	12.8942	70.3707	16.324	668.522	16.5876	618.694	16.4315	228	16.6292	304	22.515	46.1683	18.8566	49.5163	19.813	38.6279	22.624	67.6913			13.286	83.4712	16.4327	106.613	17.6011	95.8266	9.97939	139.758	11.2933	106.613	10.261	95.8266
			12.8994	61.4297	13.553	78.1833	16.3783	742.741	16.7983	681.446	16.5452	251	16.6401	349	22.7008	50.5188	19.2018	54.5386	20.7753	41.7331					13.4639	89.3427	16.5676	115.58	17.6714	103.231	10.5486	155.274	11.5498	115.58	10.3085	103.231
			12.9103	68.9426	13.5639	87.7452	16.438	833.579	17.1819	755.666	16.6047	279	16.8197	411	22.9002	55.5411	19.8156	60.4786	21.0437	45.1658					13.763	95.6495	16.5676	125.604	18.7465	111.343	10.842	174.264	11.7056	125.604	10.452	111.343
			13.5191	78.6284	13.7708	100.073	17.4041	950.689	17.317	846.503	16.9564	312	16.8796	517	23.8468	61.4812	19.9071	67.7487	21.1332	49.0032					15.2048	102.461	17.0451	136.967	19.5596	120.309	11.1919	198.747	11.8104	136.967	10.5002	120.309
			13.8562	92.2798	13.8524	117.447	18.0826	1115.75	17.4899	963.614	17.6707	355			24.0263	68.7512	21.1605	77.1214	21.584	53.3537					15.2605	109.866	18.3118	150.086	20.164	130.333	11.2425	233.253	11.9687	150.086	11.1919	130.333
			13.8833	115.617	13.8633	147.149	18.7394	1397.91	17.5385	1128.67	17.9737	416			24.5193	78.124	21.4285	90.3316	21.95	58.376					15.2605	117.977	20.7318	165.602	20.164	141.697	11.7056	292.241	12.3981	165.602	11.2425	141.697
									17.5817	1410.84	18.6555	520			24.7264	91.3341	21.6222	112.915	22.0416	64.316					15.3229	126.944	21.2643	184.592	21.1699	154.815			12.74	184.592	11.4467	154.815
															25.7304	113.917			22.515	71.5861					15.4546	136.967	21.8219	209.075	21.8033	170.331			13.4783	209.075	11.8104	170.331
																			23.2649	80.9588					15.4546	148.331	22.5292	243.581	21.8833	189.321			14.1258	243.581	12.0218	189.321
																			23.6432	94.169					15.7232	161.45	23.1862	302.57	21.8833	213.804			15.4901	302.57	16.9155	213.804
																			24.4232	116.752					15.8534	176.966			21.9634	248.31					19.0882	248.31
																									16.0515	195.956			23.2691	307.299
																									17.0609	220.439
																									17.3424	254.945
																									19.0547	313.933

## Sheet: Figure 6
	surface area of fragments at 20 km vs fragment size for a fixed input mass flux of 137 tons per day
	particle radius / m	surface area / um2 cm-3
	5e-09	21.3597
	1e-08	9.14012
	1.5e-08	5.32354
	2e-08	3.54357
	2.5e-08	2.54745
	3e-08	1.92692
	3.5e-08	1.51168
	4e-08	1.21909
	4.5e-08	1.00469
	5e-08	0.842636
	5.5e-08	0.717049
	6e-08	0.617677
	6.5e-08	0.537658
	7e-08	0.472248
	7.5e-08	0.418081
	8e-08	0.37271
	8.5e-08	0.334325
	9e-08	0.301557
	9.5e-08	0.273359
	1e-07	0.248918
	1.05e-07	0.227595
	1.1e-07	0.20888
	1.15e-07	0.192365
	1.2e-07	0.177718
	1.25e-07	0.164667
	1.3e-07	0.152989
	1.35e-07	0.142499
	1.4e-07	0.133039
	1.45e-07	0.124481
	1.5e-07	0.116713
	1.55e-07	0.10964
	1.6e-07	0.103184
	1.65e-07	0.097273
	1.7e-07	0.0918488
	1.75e-07	0.0868593
	5e-07	0.010599
	6.29e-07	0.00642233
	7.92e-07	0.00384481
	9.98e-07	0.00227033
	1.256e-06	0.00132602
	1.581e-06	0.000762313
	1.991e-06	0.000430593
	2.506e-06	0.000239482
	3.155e-06	0.000130962
	3.972e-06	7.05629e-05
	5e-06	3.75425e-05

## Sheet: Figure 7
	crystal growth rate as a function of temperature
	K / T	ln(crystal growth rate / cm s-1)
	0.00513	-2.81341
	0.00513	-2.99573
	0.00513	-4.60517
	0.00527	-3.91202
	0.00527	-5.29832
	0.00527	-4.60517
	0.00528	-4.60517
	0.00528	-4.60517
	0.00546	-3.50656
	0.00529	-4.60517
	0.00529	-4.19971
	0.0053	-4.60517
	0.0053	-3.91202
	0.0053	-4.19971
	0.00532	-3.91202
	0.00534	-5.29832
	0.00534	-5.29832
	0.00536	-4.60517
	0.00537	-3.91202
	0.00538	-4.38203
	0.00539	-4.60517
	0.00542	-4.48739
	0.00546	-6.21461
	0.00546	-5.116
	0.00481	-3.21888
	0.00481	-3.21888
	0.00489	-2.52573
	0.00492	-2.73337
	0.00497	-3.21888
	0.00497	-3.21888
	0.005	-2.65926
	0.00502	-3.21888
	0.00502	-3.21888
	0.00503	-2.52573
	0.00505	-3.50656
	0.00505	-2.99573
	0.00505	-2.81341
	0.00505	-2.81341
	0.00506	-2.65926
	0.00506	-2.52573
	0.00507	-2.65926
	0.00508	-2.81341
	0.00508	-2.52573
	0.0051	-2.90042
	0.00511	-3.50656
	0.00511	-2.99573
	0.00511	-2.81341
	0.00511	-3.91202
	0.00511	-2.81341
	0.00511	-2.65926
	0.00512	-2.65926
	0.00512	-2.81341
	0.00513	-3.21888
	0.00513	-3.21888
	0.00514	-2.81341
	0.00514	-3.50656
	0.00514	-2.99573
	0.00516	-3.21888
	0.00516	-3.21888
	0.00516	-3.35241
	0.00516	-3.10109
	0.00519	-2.81341
	0.00521	-2.52573
	0.00524	-2.99573

## Sheet: Figure 8
			surface energy derived from literature data
			horizontal axis	vertical axis
		Bertram and Sloan 1998	-199565	-12.8548
			-199999	-15.2524
			-200766	-15.334
			-201190	-17.1839
			-201508	-16.5482
			-202067	-16.4926
			-201957	-17.7014
			-202696	-18.9264
			-203348	-19.8192
			-203283	-21.0305
			-204011	-22.273
		Salcedo et al. (2001)	-191046	46.3664
			-191819	33.9552
			-192927	21.2964

## Sheet: Figure 9
	binary fraction frozen with classical nucleation theory fits						Controls as figure 3a
	Fused Quartz				fumed silica								MgFeSiO4					fused quartz fit					fumed silica fit
	T / K	fraction frozen	T / K	fraction frozen	T / K	fraction frozen	T / K	fraction frozen	T / K	fraction frozen	T / K	fraction frozen	T / K	fraction frozen	T / K	fraction frozen		T / K	ff	ff upper bound	ff lower bound		T / K	ff	ff upper bound	ff lower bound
	213.6	0.03448	211.77	0.03226	193.02	0.04348	199.13	0.03846	195	0.03448	211.88	0.03333	194.86	0.03846	195.05	0.03846		214	1.04783e-09	1.70355e-07	5.10147e-12		195	0.00127	0.0053	0.000213658
	213.18	0.06897	211.58	0.06452	192.76	0.08696	198.64	0.07692	194.55	0.06897	202.94	0.06667	190.93	0.07692	194.75	0.07692		213.9	2.8735e-09	4.55741e-07	1.43625e-11		194.9	0.00268	0.01108	0.000451114
	212.45	0.10345	211.21	0.09677	192.68	0.13043	196.13	0.11538	194.11	0.10345	201.1	0.1	190.91	0.11538	190.33	0.11538		213.8	6.01752e-09	9.28665e-07	3.09653e-11		194.8	0.00422	0.01739	0.000714585
	212.3	0.13793	211.09	0.12903	192.64	0.17391	193.74	0.15385	193.29	0.13793	194.25	0.13333	190.67	0.15385	190.29	0.15385		213.7	1.13708e-08	1.70414e-06	6.03706e-11		194.7	0.00592	0.02424	0.00101
	211.21	0.17241	211.07	0.16129	192.3	0.21739	193.15	0.19231	193.28	0.17241	193.94	0.16667	189.77	0.19231	190.27	0.19231		213.6	2.03861e-08	2.96275e-06	1.11839e-10		194.6	0.00778	0.03168	0.00133
	211.14	0.2069	210.6	0.19355	192.04	0.26087	192.58	0.23077	192.97	0.2069	193.11	0.2	189.23	0.23077	190.25	0.23077		213.5	3.54066e-08	4.98526e-06	2.00895e-10		194.5	0.00982	0.03974	0.00169
	210.39	0.24138	209.7	0.22581	191.6	0.30435	192	0.26923	192.93	0.24138	192.95	0.23333	189.21	0.26923	190.2	0.26923		213.4	6.01738e-08	8.20401e-06	3.53285e-10		194.4	0.01205	0.04845	0.00208
	209.38	0.27586	209.62	0.25806	190.83	0.34783	191.33	0.30769	192.92	0.27586	192.86	0.26667	189.14	0.30769	190.1	0.30769		213.3	1.00602e-07	1.32786e-05	6.11234e-10		194.3	0.01449	0.05784	0.00251
	209.32	0.31034	209.46	0.29032	190.7	0.3913	191.24	0.34615	191.67	0.31034	192.37	0.3	189.12	0.34615	189.66	0.34615		213.2	1.65947e-07	2.12061e-05	1.04329e-09		194.2	0.01715	0.06795	0.00299
	209.19	0.34483	209.4	0.32258	189.98	0.43478	190.92	0.38462	191.52	0.34483	192.23	0.33333	189.06	0.38462	189.59	0.38462		213.1	2.70565e-07	3.34808e-05	1.75958e-09		194.1	0.02004	0.07881	0.00351
	209.05	0.37931	209.38	0.35484	189.58	0.47826	190.77	0.42308	190.7	0.37931	192.2	0.36667	189.01	0.42308	189.55	0.42308		213	4.36505e-07	5.23227e-05	2.93532e-09		194	0.02317	0.09044	0.00408
	208.74	0.41379	209.32	0.3871	189.25	0.52174	190.65	0.46154	190.56	0.41379	191.12	0.4	189.06	0.46154	189.4	0.46154		212.9	6.97345e-07	8.10029e-05	4.8466e-09		193.9	0.02658	0.10288	0.00471
	208.73	0.44828	209.11	0.41935	188.82	0.56522	190	0.5	190.47	0.44828	190.76	0.43333	188.62	0.5	189.19	0.5		212.8	1.10376e-06	0.000124302	7.92437e-09		193.8	0.03027	0.11614	0.00539
	208.69	0.48276	208.95	0.45161	188.44	0.6087	190.03	0.53846	189.7	0.48276	190.72	0.46667	188.34	0.53846	188.94	0.53846		212.7	1.7316e-06	0.000189149	1.28352e-08		193.7	0.03426	0.13025	0.00614
	208.66	0.51724	208.94	0.48387	188.15	0.65217	189.61	0.57692	189.49	0.51724	190.19	0.5	188.19	0.57692	188.91	0.57692		212.6	2.69345e-06	0.000285518	2.06011e-08		193.6	0.03856	0.14523	0.00695
	208.64	0.55172	208.31	0.51613	188.14	0.69565	189.22	0.61538	189.18	0.55172	188.88	0.53333	187.79	0.61538	188.77	0.61538		212.5	4.15505e-06	0.000427643	3.27754e-08		193.5	0.0432	0.16108	0.00784
	208.44	0.58621	208.22	0.54839	188.05	0.73913	189.12	0.65385	187.95	0.58621	188.65	0.56667	187.69	0.65385	188.53	0.65385		212.4	6.35858e-06	0.000635703	5.16991e-08		193.4	0.0482	0.17783	0.0088
	208.41	0.62069	208.04	0.58065	187.3	0.78261	189.07	0.69231	187.84	0.62069	187.96	0.6	186.82	0.69231	188.18	0.69231		212.3	9.65512e-06	0.000938081	8.08721e-08		193.3	0.05356	0.19547	0.00984
	208.37	0.65517	207.91	0.6129	186.94	0.82609	188.36	0.73077	187.8	0.65517	187.86	0.63333	186.61	0.73077	188.02	0.73077		212.2	1.45499e-05	0.00137	1.25484e-07		193.2	0.05931	0.21399	0.01097
	208.2	0.68966	207.69	0.64516	186.79	0.86957	188.22	0.76923	187.77	0.68966	187.61	0.66667	186.41	0.76923	187.95	0.76923		212.1	2.17647e-05	0.002	1.93173e-07		193.1	0.06548	0.2334	0.01219
	208.14	0.72414	207.46	0.67742	186.64	0.91304	187.86	0.80769	187.74	0.72414	187.52	0.7	186.17	0.80769	187.32	0.80769		212	3.23236e-05	0.00289	2.95092e-07		193	0.07206	0.25367	0.01352
	207.9	0.75862	207.27	0.70968	186.14	0.95652	187.78	0.84615	187.67	0.75862	187.4	0.73333	185.85	0.84615	187.11	0.84615		211.9	4.76691e-05	0.00415	4.47408e-07		192.9	0.0791	0.27477	0.01494
	207.86	0.7931	206.61	0.74194	185.66	1	187.73	0.88462	187.63	0.7931	187.33	0.76667	185.65	0.88462	186.65	0.88462		211.8	6.98203e-05	0.00591	6.7339e-07		192.8	0.08659	0.29669	0.01648
	207.58	0.82759	206.59	0.77419			187.46	0.92308	187.61	0.82759	187.39	0.8	185.61	0.92308	186.57	0.92308		211.7	0.000101584	0.00838	1.00629e-06		192.7	0.09456	0.31938	0.01814
	207.12	0.86207	206.25	0.80645			187.16	0.96154	187.59	0.86207	187.35	0.83333	185.43	0.96154	186.44	0.96154		211.6	0.000146837	0.01179	1.49332e-06		192.6	0.10302	0.34278	0.01992
	207.07	0.89655	206.2	0.83871			186.49	1	187.33	0.89655	187.29	0.86667	185.38	1	186.11	1		211.5	0.000210902	0.01648	2.20102e-06		192.5	0.11199	0.36685	0.02183
	206.37	0.93103	205.96	0.87097					187.26	0.93103	186.55	0.9						211.4	0.00030104	0.02288	3.2226e-06		192.4	0.12148	0.39152	0.02388
	206.06	0.96552	205.94	0.90323					186.94	0.96552	186.26	0.93333						211.3	0.0004271	0.03156	4.68781e-06		192.3	0.13151	0.41671	0.02607
	205.01	1	205.5	0.93548					186.88	1	185.8	0.96667						211.2	0.000602356	0.04323	6.7761e-06		192.2	0.14208	0.44235	0.02842
			205.37	0.96774							185.62	1						211.1	0.0008446	0.05876	9.73419e-06		192.1	0.15321	0.46835	0.03093
			205.2	1														211	0.00118	0.07923	1.38993e-05		192	0.1649	0.4946	0.03361
																		210.9	0.00163	0.10591	1.97296e-05		191.9	0.17716	0.52101	0.03646
																		210.8	0.00225	0.1402	2.7844e-05		191.8	0.18999	0.54748	0.03949
																		210.7	0.00309	0.18359	3.90745e-05		191.7	0.20339	0.57389	0.04272
																		210.6	0.00421	0.23743	5.45327e-05		191.6	0.21737	0.60013	0.04614
																		210.5	0.00572	0.30269	7.56961e-05		191.5	0.23191	0.62609	0.04977
																		210.4	0.00772	0.37957	0.000104519		191.4	0.24701	0.65166	0.05362
																		210.3	0.01037	0.46695	0.000143573		191.3	0.26265	0.67671	0.05769
																		210.2	0.01385	0.56203	0.000196224		191.2	0.27883	0.70116	0.06198
																		210.1	0.01841	0.65998	0.000266858		191.1	0.29553	0.72489	0.06652
																		210	0.02435	0.75429	0.000361163		191	0.31272	0.74781	0.0713
																		209.9	0.03203	0.83778	0.000486477		190.9	0.33039	0.76983	0.07632
																		209.8	0.0419	0.90437	0.000652229		190.8	0.3485	0.79089	0.08161
																		209.7	0.05451	0.95107	0.000870473		190.7	0.36702	0.8109	0.08716
																		209.6	0.07048	0.97901	0.00116		190.6	0.38592	0.82982	0.09298
																		209.5	0.09054	0.99277	0.00153		190.5	0.40517	0.84761	0.09908
																		209.4	0.11553	0.9981	0.00202		190.4	0.42472	0.86423	0.10545
																		209.3	0.1463	0.99964	0.00264		190.3	0.44453	0.87968	0.11212
																		209.2	0.18374	0.99996	0.00345		190.2	0.46455	0.89394	0.11907
																		209.1	0.22865	1	0.00449		190.1	0.48473	0.90702	0.12631
																		209	0.28162	1	0.00582		190	0.50503	0.91895	0.13386
																		208.9	0.34288	1	0.0075		189.9	0.5254	0.92976	0.1417
																		208.8	0.41208	1	0.00964		189.8	0.54577	0.93949	0.14984
																		208.7	0.48809	1	0.01234		189.7	0.5661	0.94819	0.15828
																		208.6	0.56885	1	0.01573		189.6	0.58633	0.95591	0.16702
																		208.5	0.65128	1	0.01998		189.5	0.60641	0.96272	0.17607
																		208.4	0.7315	1	0.02526		189.4	0.62628	0.96868	0.18541
																		208.3	0.80524	1	0.03182		189.3	0.64589	0.97386	0.19505
																		208.2	0.86854	1	0.03991		189.2	0.66519	0.97833	0.20498
																		208.1	0.91864	1	0.04984		189.1	0.68413	0.98215	0.2152
																		208	0.95462	1	0.06197		189	0.70266	0.98541	0.22571
																		207.9	0.97766	1	0.0767		188.9	0.72074	0.98815	0.2365
																		207.8	0.99052	1	0.09446		188.8	0.73832	0.99045	0.24756
																		207.7	0.99663	1	0.11574		188.7	0.75537	0.99235	0.25888
																		207.6	0.99903	1	0.14104		188.6	0.77185	0.99392	0.27045
																		207.5	0.99978	1	0.17084		188.5	0.78774	0.99521	0.28228
																		207.4	0.99996	1	0.20562		188.4	0.80301	0.99625	0.29433
																		207.3	1	1	0.24576		188.3	0.81763	0.99709	0.30662
																		207.2	1	1	0.29151		188.2	0.83159	0.99775	0.31911
																		207.1	1	1	0.34289		188.1	0.84488	0.99828	0.3318
																		207	1	1	0.39967		188	0.85749	0.9987	0.34468
																		206.9	1	1	0.46122		187.9	0.86941	0.99902	0.35772
																		206.8	1	1	0.5265		187.8	0.88065	0.99927	0.37093
																		206.7	1	1	0.59402		187.7	0.89121	0.99946	0.38427
																		206.6	1	1	0.66183		187.6	0.9011	0.9996	0.39774
																		206.5	1	1	0.72768		187.5	0.91033	0.99971	0.41131
																		206.4	1	1	0.7892		187.4	0.91892	0.99979	0.42497
																		206.3	1	1	0.84416		187.3	0.92689	0.99985	0.4387
																		206.2	1	1	0.89078		187.2	0.93425	0.99989	0.45249
																		206.1	1	1	0.92804		187.1	0.94103	0.99992	0.46632
																		206	1	1	0.95587		187	0.94726	0.99995	0.48016
																		205.9	1	1	0.97508		186.9	0.95296	0.99996	0.494
																		205.8	1	1	0.9872		186.8	0.95816	0.99997	0.50783
																		205.7	1	1	0.99411		186.7	0.96288	0.99998	0.52162
																		205.6	1	1	0.99761		186.6	0.96716	0.99999	0.53535
																		205.5	1	1	0.99916		186.5	0.97103	0.99999	0.54902
																		205.4	1	1	0.99975		186.4	0.97451	0.99999	0.56259
																		205.3	1	1	0.99994		186.3	0.97764	1	0.57606
																		205.2	1	1	0.99999		186.2	0.98043	1	0.58941
																		205.1	1	1	1		186.1	0.98292	1	0.60262
																		205	1	1	1		186	0.98513	1	0.61568
																		204.9	1	1	1		185.9	0.98709	1	0.62858
																		204.8	1	1	1		185.8	0.98883	1	0.64129
																		204.7	1	1	1		185.7	0.99035	1	0.65381
																		204.6	1	1	1		185.6	0.99169	1	0.66613
																		204.5	1	1	1		185.5	0.99286	1	0.67822
																		204.4	1	1	1		185.4	0.99388	1	0.69009
																		204.3	1	1	1		185.3	0.99477	1	0.70173
																		204.2	1	1	1		185.2	0.99554	1	0.71311
																		204.1	1	1	1		185.1	0.9962	1	0.72425
																		204	1	1	1		185	0.99678	1	0.73512
																							184.9			0.74573
																							184.8			0.75606
																							184.7			0.76612
																							184.6			0.7759
																							184.5			0.7854
																							184.4			0.79461
																							184.3			0.80354
																							184.2			0.81218
																							184.1			0.82054
																							184			0.82862
																							183.9			0.83642
																							183.8			0.84394
																							183.7			0.85118
																							183.6			0.85815
																							183.5			0.86486
																							183.4			0.8713
																							183.3			0.87749
																							183.2			0.88342
																							183.1			0.88911
																							183			0.89455
																							182.9			0.89976
																							182.8			0.90475
																							182.7			0.90951
																							182.6			0.91405
																							182.5			0.91839
																							182.4			0.92253
																							182.3			0.92647
																							182.2			0.93023
																							182.1			0.9338
																							182			0.93721
																							181.9			0.94044
																							181.8			0.94351
																							181.7			0.94643
																							181.6			0.9492
																							181.5			0.95184
																							181.4			0.95433
																							181.3			0.9567
																							181.2			0.95894
																							181.1			0.96107
																							181			0.96308
																							180.9			0.96499
																							180.8			0.96679
																							180.7			0.9685
																							180.6			0.97012
																							180.5			0.97165
																							180.4			0.97309
																							180.3			0.97446
																							180.2			0.97576
																							180.1			0.97698
																							180			0.97813

## Sheet: Figure 10
	Size distribution fitted to Bigg 2012 and after nucleation
		dn/dlogr particles cm-3
			after
	rNP / nm	Bigg fit	15 ppbv HNO3, 0.05 J m-2	15 ppbv HNO3, 0.15 J m-2	15 ppbv HNO3, 0.15 J m-2	10 ppbv HNO3, 0.05 J m-2	10 ppbv HNO3, 0.15 J m-2	10 ppbv HNO3, 0.15 J m-2
	1	0.1872	0.1852	0.1872	0.1872	0.1872	0.1872	0.1872
	1.1	0.1913	0.1868	0.1913	0.1913	0.1913	0.1913	0.1913
	1.21	0.1959	0.186	0.1959	0.1959	0.1959	0.1959	0.1959
	1.331	0.201	0.1802	0.201	0.201	0.201	0.201	0.201
	1.4641	0.2067	0.1654	0.2067	0.2067	0.2067	0.2067	0.2067
	1.61051	0.2131	0.1387	0.2131	0.2131	0.2131	0.2131	0.2131
	1.77156	0.2204	0.103	0.2204	0.2204	0.2204	0.2204	0.2204
	1.94872	0.2286	0.0674	0.2286	0.2286	0.2286	0.2286	0.2286
	2.14359	0.2378	0.0401	0.2378	0.2378	0.2378	0.2378	0.2378
	2.35795	0.2483	0.0228	0.2483	0.2483	0.2483	0.2483	0.2483
	2.59374	0.2601	0.0128	0.2601	0.2601	0.2601	0.2601	0.2601
	2.85312	0.2736	0.0073	0.2736	0.2736	0.2736	0.2736	0.2736
	3.13843	0.289	0.0043	0.289	0.289	0.289	0.289	0.289
	3.45227	0.3065	0.0026	0.3065	0.3065	0.3065	0.3065	0.3065
	3.7975	0.3266	0.0016	0.3266	0.3266	0.3266	0.3266	0.3266
	4.17725	0.3496	0.001	0.3496	0.3496	0.3496	0.3496	0.3496
	4.59497	0.3761	0.0006	0.3761	0.3761	0.3759	0.3761	0.3761
	5.05447	0.4064	0.0004	0.4064	0.4064	0.4062	0.4064	0.4064
	5.55992	0.4413	0.0003	0.4411	0.4413	0.4408	0.4413	0.4413
	6.11591	0.4814	0.0002	0.4788	0.4814	0.4805	0.4814	0.4814
	6.7275	0.5274	0.0001	0.5069	0.5274	0.5256	0.5274	0.5274
	7.40025	0.58	0.0001	0.4649	0.58	0.5764	0.58	0.58
	8.14027	0.6398	0.0001	0.2771	0.6398	0.633	0.6398	0.6398
	8.9543	0.7072	0	0.0996	0.707	0.6946	0.7072	0.7072
	9.84973	0.7821	0	0.031	0.7785	0.7593	0.7821	0.7821
	10.8347	0.8637		0.0104	0.8244	0.8235	0.8637	0.8637
	11.9182	0.9501		0.0039	0.6904	0.8816	0.9501	0.9501
	13.11	1.0377		0.0016	0.2999	0.9255	1.0376	1.0377
	14.421	1.1204		0.0007	0.0786	0.9459	1.1202	1.1204
	15.8631	1.1894		0.0003	0.0208	0.9343	1.189	1.1894
	17.4494	1.2332		0.0002	0.0063	0.8867	1.2318	1.2332
	19.1943	1.238		0.0001	0.0022	0.806	1.2343	1.2379
	21.1138	1.1903		0	0.0008	0.7013	1.1823	1.1903
	23.2252	1.0817		0	0.0003	0.5851	1.0669	1.0815
	25.5477	0.9136			0.0002	0.4688	0.8917	0.9131
	28.1024	0.7024			0.0001	0.3595	0.6771	0.7016
	30.9127	0.4793			0	0.2604	0.4572	0.4782
	34.0039	0.2812			0	0.1726	0.2676	0.2803
	37.4043	0.1365			0	0.0985	0.1309	0.136
	41.1448	0.0523				0.0441	0.0509	0.0521
	45.2593	0.0149				0.014	0.0147	0.0149
	49.7852	0.0029				0.0029	0.0029	0.0029
	54.7637	0.0003679				0.000367	0.0003677	0.0003679
	60.2401	2.628e-05
	66.2641	9.399e-07
	72.8905	1.435e-08
	80.1795	7.71e-11
	88.1975	1.151e-13
	97.0172	3.579e-17
	106.719	1.636e-21

## Sheet: Figure 11
		atmospheric crystal number concentration in a trajectory model.
		observed max	0.00016	cm-3
		observed min	6e-06	cm-3
		parameterised crystal numbers:			This work CNT
			Voigt (2005)		15 ppbv HNO3			10 ppbv HNO3			Hoyle (2013)
		time / hours	10 ppbv HNO3	15 ppbv HNO3	0.05	0.1	0.15	0.05	0.1	0.15	Time / hours	10 ppbv HNO3	15 ppbv HNO3
		-19.3701	0	0	0	0	0	0	0	0	-20	5.86008e-21	2.48875e-43
		-19	1e-08	5e-07	0	0	0	0	0	0	-19.9722	6.7108e-21	2.50652e-43
		-18.5	1e-07	2.4e-06	0	0	0	0	0	0	-19.9444	6.82443e-21	2.50661e-43
		-18	5.76e-07	6.4e-06	0	0	0	0	0	0	-19.9167	6.83833e-21	2.50661e-43
		-17.5	4.576e-06	1.04e-05	0	0	0	0	0	0	-19.8889	6.83988e-21	2.50661e-43
		-17	8.576e-06	1.44e-05	0	0	0	0	0	0	-19.8611	6.84003e-21	2.50661e-43
		-16.5	1.2576e-05	1.84e-05	0	0	0	0	0	0	-19.8333	6.84005e-21	2.50661e-43
		-16	1.6576e-05	2.24e-05	0	0	0	0	0	0	-19.8056	6.84005e-21	2.50661e-43
		-15.5	2.0576e-05	2.64e-05	0	0	0	0	0	0	-19.7778	6.84005e-21	2.50661e-43
		-15	2.4576e-05	3.04e-05	1.04895e-12	7.0769e-16	0	0	0	0	-19.75	6.84005e-21	2.50661e-43
		-14.5	2.8576e-05	3.44e-05	3.05858e-07	1.04631e-09	8.77468e-12	0	0	0	-19.7222	6.84005e-21	2.50661e-43
		-14	3.2576e-05	3.84e-05	0.00142	1.38074e-05	2.63755e-07	0	0	0	-19.6944	6.84005e-21	2.50661e-43
		-13.5	3.6576e-05	4.24e-05	0.50495	0.01024	0.000344611	2.5584e-11	2.69134e-14	9.3057e-17	-19.6667	6.84005e-21	2.50661e-43
		-13	4.0576e-05	4.64e-05	11.1718	1.03455	0.05794	7.33121e-08	2.13102e-10	1.57345e-12	-19.6389	6.84005e-21	2.50661e-43
		-12.5	4.4576e-05	5.04e-05	17.0332	7.17783	1.69152	2.03922e-05	1.19378e-07	1.52796e-09	-19.6111	6.84005e-21	2.50661e-43
		-12	4.8576e-05	5.44e-05	19.2112	10.9362	5.3787	0.00116	1.10243e-05	2.0787e-07	-19.5833	6.84005e-21	2.50661e-43
		-11.5	5.2576e-05	5.84e-05	20.3189	12.9411	7.82767	0.02112	0.000282882	6.98784e-06	-19.5556	6.84005e-21	2.50661e-43
		-11	5.6576e-05	6.24e-05	20.9871	14.0991	9.35634	0.167	0.00283	8.4065e-05	-19.5278	6.84005e-21	2.50661e-43
		-10.5	6.0576e-05	6.64e-05	21.4177	14.8113	10.3241	0.68524	0.01396	0.000465899	-19.5	6.84005e-21	2.50661e-43
		-10	6.4576e-05	7.04e-05	21.6958	15.2508	10.9286	1.65372	0.03984	0.00143	-19.4722	6.84005e-21	2.50661e-43
		-9.5	6.8576e-05	7.44e-05	21.8697	15.5114	11.2882	2.68982	0.0751	0.00279	-19.4444	6.84005e-21	2.50661e-43
		-9	7.2576e-05	7.84e-05	21.9715	15.6543	11.4828	3.41678	0.10521	0.00396	-19.4167	6.84005e-21	2.50661e-43
		-8.5	7.6576e-05	8.24e-05	22.0254	15.7234	11.5746	3.79058	0.12211	0.00459	-19.3889	6.84005e-21	2.50661e-43
		-8	8.0576e-05	8.64e-05	22.0503	15.7515	11.6104	3.93613	0.12852	0.00481	-19.3611	6.84005e-21	2.50661e-43
		-7.5	8.4576e-05	9.04e-05	22.06	15.7607	11.6214	3.97852	0.1302	0.00486	-19.3333	6.84005e-21	2.50661e-43
		-7	8.8576e-05	9.44e-05	22.0631	15.763	11.624	3.98757	0.1305	0.00487	-19.3056	6.84005e-21	2.50661e-43
		-6.5	9.2576e-05	9.84e-05	22.0639	15.7634	11.6245	3.98897	0.13053	0.00487	-19.2778	6.84005e-21	2.50661e-43
		-6	9.6576e-05	0.0001024	22.0641	15.7635	11.6245	3.98913	0.13054	0.00487	-19.25	6.84005e-21	2.50661e-43
		-5.5	0.000100576	0.0001064	22.0641	15.7635	11.6245	3.98914	0.13054	0.00487	-19.2222	6.84005e-21	2.50661e-43
		-5	0.000104576	0.0001104	22.0641	15.7635	11.6245	3.98914	0.13054	0.00487	-19.1944	6.84005e-21	2.50661e-43
		-4.5	0.000108576	0.0001144	22.0641	15.7635	11.6245	3.98914	0.13054	0.00487	-19.1667	6.84005e-21	2.50661e-43
		-4	0.000112576	0.0001184	22.0641	15.7635	11.6245	3.98914	0.13054	0.00487	-19.1389	6.84005e-21	2.50661e-43
		-3.5	0.000116576	0.0001224	22.0641	15.7635	11.6245	3.98914	0.13054	0.00487	-19.1111	6.84005e-21	2.50661e-43
		-3	0.000120576	0.0001264	22.0641	15.7635	11.6245	3.98914	0.13054	0.00487	-19.0833	6.84005e-21	2.50661e-43
		-2.5	0.000124576	0.0001304	22.0641	15.7635	11.6245	3.98914	0.13054	0.00487	-19.0556	6.84005e-21	2.50661e-43
		-2	0.000128576	0.0001344	22.0641	15.7635	11.6245	3.98914	0.13054	0.00487	-19.0278	6.84005e-21	2.50661e-43
		-1.5	0.000132576	0.0001384	22.0641	15.7635	11.6245	3.98914	0.13054	0.00487	-19	6.84005e-21	2.50661e-43
		-1	0.000136576	0.0001424	22.0641	15.7635	11.6245	3.98914	0.13054	0.00487	-18.9722	6.84005e-21	2.50661e-43
		-0.5	0.000140576	0.0001464	22.0641	15.7635	11.6245	3.98914	0.13054	0.00487	-18.9444	6.84005e-21	2.50661e-43
		0	0.000144576	0.0001504	22.0641	15.7635	11.6245	3.98914	0.13054	0.00487	-18.9167	6.84005e-21	2.50661e-43
											-18.8889	6.84005e-21	2.50661e-43
											-18.8611	6.84005e-21	2.50661e-43
											-18.8333	6.84005e-21	2.50661e-43
											-18.8056	6.84005e-21	2.50661e-43
											-18.7778	6.84005e-21	2.50661e-43
											-18.75	6.84005e-21	2.50661e-43
											-18.7222	6.84005e-21	2.50661e-43
											-18.6944	6.84005e-21	2.50661e-43
											-18.6667	6.84005e-21	2.50661e-43
											-18.6389	6.84005e-21	2.50661e-43
											-18.6111	6.84005e-21	2.50661e-43
											-18.5833	6.84005e-21	2.50661e-43
											-18.5556	6.84005e-21	2.50661e-43
											-18.5278	6.84005e-21	2.50661e-43
											-18.5	6.84005e-21	2.50661e-43
											-18.4722	6.84005e-21	2.50661e-43
											-18.4444	6.84005e-21	2.50661e-43
											-18.4167	6.84005e-21	2.50661e-43
											-18.3889	6.84005e-21	2.50661e-43
											-18.3611	6.84005e-21	2.50661e-43
											-18.3333	6.84005e-21	2.50661e-43
											-18.3056	6.84005e-21	2.50661e-43
											-18.2778	6.84005e-21	2.50661e-43
											-18.25	6.84005e-21	2.50661e-43
											-18.2222	6.84005e-21	2.50661e-43
											-18.1944	6.84005e-21	2.50661e-43
											-18.1667	6.84005e-21	2.50661e-43
											-18.1389	6.84005e-21	2.50661e-43
											-18.1111	6.84005e-21	2.50661e-43
											-18.0833	6.84005e-21	2.50661e-43
											-18.0556	6.84005e-21	2.50661e-43
											-18.0278	6.84005e-21	2.50661e-43
											-18	6.84005e-21	2.50661e-43
											-17.9722	6.84005e-21	2.50661e-43
											-17.9444	6.84005e-21	2.50661e-43
											-17.9167	6.84005e-21	2.50661e-43
											-17.8889	6.84005e-21	2.50661e-43
											-17.8611	6.84005e-21	2.50661e-43
											-17.8333	6.84005e-21	2.50661e-43
											-17.8056	6.84005e-21	2.50661e-43
											-17.7778	6.84005e-21	2.50661e-43
											-17.75	6.84005e-21	2.50661e-43
											-17.7222	6.84005e-21	2.50661e-43
											-17.6944	6.84005e-21	2.50661e-43
											-17.6667	6.84005e-21	2.50661e-43
											-17.6389	6.84005e-21	2.50661e-43
											-17.6111	6.84005e-21	2.50661e-43
											-17.5833	6.84005e-21	2.50661e-43
											-17.5556	6.84005e-21	2.50661e-43
											-17.5278	6.84005e-21	2.50661e-43
											-17.5	6.84005e-21	2.50661e-43
											-17.4722	6.84005e-21	2.50661e-43
											-17.4444	6.84005e-21	2.50661e-43
											-17.4167	6.84005e-21	2.50661e-43
											-17.3889	6.84005e-21	2.50661e-43
											-17.3611	6.84005e-21	2.50661e-43
											-17.3333	6.84005e-21	2.50661e-43
											-17.3056	6.84005e-21	2.50661e-43
											-17.2778	6.84005e-21	2.50661e-43
											-17.25	6.84005e-21	2.50661e-43
											-17.2222	6.84005e-21	2.50661e-43
											-17.1944	6.84005e-21	2.50661e-43
											-17.1667	6.84005e-21	2.50661e-43
											-17.1389	6.84005e-21	2.50661e-43
											-17.1111	6.84005e-21	2.50662e-43
											-17.0833	6.84005e-21	2.50672e-43
											-17.0556	6.84005e-21	2.50887e-43
											-17.0278	6.84005e-21	2.55062e-43
											-17	6.84005e-21	3.26477e-43
											-16.9722	6.84005e-21	1.41258e-42
											-16.9444	6.84005e-21	1.61841e-41
											-16.9167	6.84005e-21	1.96839e-40
											-16.8889	6.84005e-21	2.194e-39
											-16.8611	6.84005e-21	2.2251e-38
											-16.8333	6.84005e-21	2.06113e-37
											-16.8056	6.84005e-21	1.75154e-36
											-16.7778	6.84005e-21	1.37143e-35
											-16.75	6.84005e-21	9.93459e-35
											-16.7222	6.84005e-21	6.68418e-34
											-16.6944	6.84005e-21	4.19254e-33
											-16.6667	6.84005e-21	2.46014e-32
											-16.6389	6.84005e-21	1.35502e-31
											-16.6111	6.84005e-21	7.02727e-31
											-16.5833	6.84005e-21	3.44174e-30
											-16.5556	6.84005e-21	1.59632e-29
											-16.5278	6.84005e-21	7.03007e-29
											-16.5	6.84005e-21	2.9469e-28
											-16.4722	6.84005e-21	1.17855e-27
											-16.4444	6.84005e-21	4.50673e-27
											-16.4167	6.84005e-21	1.65117e-26
											-16.3889	6.84005e-21	5.80749e-26
											-16.3611	6.84005e-21	1.96443e-25
											-16.3333	6.84005e-21	6.40155e-25
											-16.3056	6.84005e-21	2.01296e-24
											-16.2778	6.84005e-21	6.11719e-24
											-16.25	6.84005e-21	1.79911e-23
											-16.2222	6.84005e-21	5.12795e-23
											-16.1944	6.84005e-21	1.4183e-22
											-16.1667	6.84005e-21	3.81116e-22
											-16.1389	6.84005e-21	9.96118e-22
											-16.1111	6.84005e-21	2.53513e-21
											-16.0833	6.84005e-21	6.2889e-21
											-16.0556	6.84005e-21	1.52215e-20
											-16.0278	6.84005e-21	3.59796e-20
											-16	6.84005e-21	8.31286e-20
											-15.9722	6.84005e-21	1.87891e-19
											-15.9444	6.84005e-21	4.15788e-19
											-15.9167	6.84005e-21	9.01522e-19
											-15.8889	6.84005e-21	1.91662e-18
											-15.8611	6.84005e-21	3.99806e-18
											-15.8333	6.84005e-21	8.18851e-18
											-15.8056	6.84005e-21	1.64769e-17
											-15.7778	6.84005e-21	3.2593e-17
											-15.75	6.84005e-21	6.34163e-17
											-15.7222	6.84005e-21	1.21435e-16
											-15.6944	6.84005e-21	2.28971e-16
											-15.6667	6.84005e-21	4.25337e-16
											-15.6389	6.84005e-21	7.78773e-16
											-15.6111	6.84005e-21	1.40609e-15
											-15.5833	6.84005e-21	2.50458e-15
											-15.5556	6.84005e-21	4.40311e-15
											-15.5278	6.84005e-21	7.64302e-15
											-15.5	6.84005e-21	1.31045e-14
											-15.4722	6.84005e-21	2.22021e-14
											-15.4444	6.84005e-21	3.71824e-14
											-15.4167	6.84006e-21	6.15748e-14
											-15.3889	6.84007e-21	1.00864e-13
											-15.3611	6.8401e-21	1.63485e-13
											-15.3333	6.8402e-21	2.62278e-13
											-15.3056	6.84043e-21	4.16596e-13
											-15.2778	6.841e-21	6.55335e-13
											-15.25	6.84236e-21	1.02123e-12
											-15.2222	6.84556e-21	1.57694e-12
											-15.1944	6.8529e-21	2.4135e-12
											-15.1667	6.86938e-21	3.66204e-12
											-15.1389	6.90567e-21	5.50994e-12
											-15.1111	6.98398e-21	8.22275e-12
											-15.0833	7.14979e-21	1.21738e-11
											-15.0556	7.49448e-21	1.78842e-11
											-15.0278	8.19837e-21	2.60752e-11
											-15	9.61125e-21	3.77388e-11
											-14.9722	1.24004e-20	5.42284e-11
											-14.9444	1.78184e-20	7.73783e-11
											-14.9167	2.81799e-20	1.09657e-10
											-14.8889	4.7698e-20	1.54364e-10
											-14.8611	8.39297e-20	2.15877e-10
											-14.8333	1.50238e-19	2.9997e-10
											-14.8056	2.69932e-19	4.14201e-10
											-14.7778	4.83124e-19	5.68399e-10
											-14.75	8.57961e-19	7.75258e-10
											-14.7222	1.50876e-18	1.05106e-09
											-14.6944	2.625e-18	1.41652e-09
											-14.6667	4.51697e-18	1.89784e-09
											-14.6389	7.68706e-18	2.5279e-09
											-14.6111	1.29396e-17	3.34766e-09
											-14.5833	2.15484e-17	4.40773e-09
											-14.5556	3.55099e-17	5.77026e-09
											-14.5278	5.79207e-17	7.51098e-09
											-14.5	9.35364e-17	9.72147e-09
											-14.4722	1.4959e-16	1.25117e-08
											-14.4444	2.3698e-16	1.60124e-08
											-14.4167	3.71974e-16	2.03777e-08
											-14.3889	5.78647e-16	2.57875e-08
											-14.3611	8.92306e-16	3.24483e-08
											-14.3333	1.36431e-15	4.05949e-08
											-14.3056	2.06873e-15	5.04903e-08
											-14.2778	3.11159e-15	6.24272e-08
											-14.25	4.64338e-15	7.67306e-08
											-14.2222	6.87615e-15	9.37628e-08
											-14.1944	1.01065e-14	1.13931e-07
											-14.1667	1.47462e-14	1.37701e-07
											-14.1389	2.13629e-14	1.65602e-07
											-14.1111	3.07339e-14	1.98242e-07
											-14.0833	4.39162e-14	2.36298e-07
											-14.0556	6.23381e-14	2.80502e-07
											-14.0278	8.79166e-14	3.31612e-07
											-14	1.23209e-13	3.90371e-07
											-13.9722	1.71607e-13	4.57475e-07
											-13.9444	2.37579e-13	5.3356e-07
											-13.9167	3.26982e-13	6.19209e-07
											-13.8889	4.47445e-13	7.15004e-07
											-13.8611	6.08854e-13	8.2159e-07
											-13.8333	8.23944e-13	9.39759e-07
											-13.8056	1.10904e-12	1.07052e-06
											-13.7778	1.48496e-12	1.21516e-06
											-13.75	1.9781e-12	1.37522e-06
											-13.7222	2.62178e-12	1.55238e-06
											-13.6944	3.45787e-12	1.74835e-06
											-13.6667	4.53866e-12	1.96466e-06
											-13.6389	5.92926e-12	2.20244e-06
											-13.6111	7.71025e-12	2.46238e-06
											-13.5833	9.981e-12	2.74468e-06
											-13.5556	1.28634e-11	3.04919e-06
											-13.5278	1.65066e-11	3.37562e-06
											-13.5	2.10917e-11	3.72375e-06
											-13.4722	2.68385e-11	4.09376e-06
											-13.4444	3.40121e-11	4.48642e-06
											-13.4167	4.29308e-11	4.90322e-06
											-13.3889	5.39759e-11	5.3464e-06
											-13.3611	6.76018e-11	5.81877e-06
											-13.3333	8.43481e-11	6.3234e-06
											-13.3056	1.04853e-10	6.8632e-06
											-13.2778	1.29868e-10	7.44046e-06
											-13.25	1.60277e-10	8.0565e-06
											-13.2222	1.97112e-10	8.71147e-06
											-13.1944	2.41574e-10	9.40441e-06
											-13.1667	2.95061e-10	1.01334e-05
											-13.1389	3.59186e-10	1.08961e-05
											-13.1111	4.35808e-10	1.16898e-05
											-13.0833	5.27063e-10	1.25126e-05
											-13.0556	6.35391e-10	1.3363e-05
											-13.0278	7.63572e-10	1.42408e-05
											-13	9.14765e-10	1.51471e-05
											-12.9722	1.09254e-09	1.60842e-05
											-12.9444	1.30091e-09	1.70556e-05
											-12.9167	1.54441e-09	1.80653e-05
											-12.8889	1.82807e-09	1.91176e-05
											-12.8611	2.15752e-09	2.02163e-05
											-12.8333	2.53902e-09	2.13641e-05
											-12.8056	2.97946e-09	2.25624e-05
											-12.7778	3.48646e-09	2.38109e-05
											-12.75	4.06838e-09	2.51078e-05
											-12.7222	4.73436e-09	2.64498e-05
											-12.6944	5.49439e-09	2.78326e-05
											-12.6667	6.35931e-09	2.92515e-05
											-12.6389	7.34084e-09	3.07017e-05
											-12.6111	8.45166e-09	3.21788e-05
											-12.5833	9.70539e-09	3.36795e-05
											-12.5556	1.11166e-08	3.52015e-05
											-12.5278	1.27009e-08	3.67442e-05
											-12.5	1.44748e-08	3.8308e-05
											-12.4722	1.64557e-08	3.98952e-05
											-12.4444	1.86621e-08	4.15089e-05
											-12.4167	2.11131e-08	4.3153e-05
											-12.3889	2.38288e-08	4.48319e-05
											-12.3611	2.68298e-08	4.65498e-05
											-12.3333	3.01374e-08	4.83103e-05
											-12.3056	3.37733e-08	5.01161e-05
											-12.2778	3.77595e-08	5.19685e-05
											-12.25	4.21181e-08	5.38673e-05
											-12.2222	4.68717e-08	5.5811e-05
											-12.1944	5.20427e-08	5.77966e-05
											-12.1667	5.76536e-08	5.98203e-05
											-12.1389	6.3727e-08	6.1877e-05
											-12.1111	7.02854e-08	6.39614e-05
											-12.0833	7.73517e-08	6.60682e-05
											-12.0556	8.49488e-08	6.81921e-05
											-12.0278	9.30999e-08	7.03282e-05
											-12	1.01829e-07	7.24725e-05
											-11.9722	1.1116e-07	7.46218e-05
											-11.9444	1.21118e-07	7.6774e-05
											-11.9167	1.31729e-07	7.89278e-05
											-11.8889	1.43018e-07	8.1083e-05
											-11.8611	1.55012e-07	8.32406e-05
											-11.8333	1.67738e-07	8.5402e-05
											-11.8056	1.81224e-07	8.75695e-05
											-11.7778	1.95495e-07	8.97459e-05
											-11.75	2.10577e-07	9.19339e-05
											-11.7222	2.26494e-07	9.41365e-05
											-11.6944	2.43269e-07	9.63562e-05
											-11.6667	2.60923e-07	9.85955e-05
											-11.6389	2.79471e-07	0.000100856
											-11.6111	2.98929e-07	0.000103138
											-11.5833	3.19305e-07	0.000105443
											-11.5556	3.40605e-07	0.00010777
											-11.5278	3.62833e-07	0.000110118
											-11.5	3.85985e-07	0.000112484
											-11.4722	4.10056e-07	0.000114867
											-11.4444	4.35035e-07	0.000117263
											-11.4167	4.60911e-07	0.000119669
											-11.3889	4.87666e-07	0.000122082
											-11.3611	5.15283e-07	0.000124498
											-11.3333	5.43742e-07	0.000126912
											-11.3056	5.7302e-07	0.000129323
											-11.2778	6.03096e-07	0.000131725
											-11.25	6.33947e-07	0.000134117
											-11.2222	6.65549e-07	0.000136495
											-11.1944	6.9788e-07	0.000138857
											-11.1667	7.30919e-07	0.000141201
											-11.1389	7.64645e-07	0.000143525
											-11.1111	7.99038e-07	0.000145828
											-11.0833	8.3408e-07	0.00014811
											-11.0556	8.69754e-07	0.000150369
											-11.0278	9.06045e-07	0.000152605
											-11	9.42938e-07	0.000154819
											-10.9722	9.80419e-07	0.000157011
											-10.9444	1.01848e-06	0.000159181
											-10.9167	1.0571e-06	0.000161331
											-10.8889	1.09627e-06	0.000163459
											-10.8611	1.13598e-06	0.000165569
											-10.8333	1.17622e-06	0.00016766
											-10.8056	1.21696e-06	0.000169733
											-10.7778	1.25821e-06	0.000171789
											-10.75	1.29994e-06	0.00017383
											-10.7222	1.34212e-06	0.000175855
											-10.6944	1.38476e-06	0.000177865
											-10.6667	1.42781e-06	0.00017986
											-10.6389	1.47125e-06	0.000181841
											-10.6111	1.51507e-06	0.000183809
											-10.5833	1.55923e-06	0.000185762
											-10.5556	1.6037e-06	0.000187701
											-10.5278	1.64844e-06	0.000189626
											-10.5	1.69343e-06	0.000191537
											-10.4722	1.73862e-06	0.000193432
											-10.4444	1.78399e-06	0.000195311
											-10.4167	1.82948e-06	0.000197175
											-10.3889	1.87507e-06	0.000199021
											-10.3611	1.9207e-06	0.00020085
											-10.3333	1.96635e-06	0.00020266
											-10.3056	2.01196e-06	0.000204452
											-10.2778	2.0575e-06	0.000206223
											-10.25	2.10293e-06	0.000207974
											-10.2222	2.1482e-06	0.000209703
											-10.1944	2.19327e-06	0.00021141
											-10.1667	2.23812e-06	0.000213094
											-10.1389	2.28269e-06	0.000214754
											-10.1111	2.32695e-06	0.00021639
											-10.0833	2.37087e-06	0.000218001
											-10.0556	2.41441e-06	0.000219587
											-10.0278	2.45754e-06	0.000221147
											-10	2.50022e-06	0.00022268
											-9.97222	2.54244e-06	0.000224187
											-9.94444	2.58415e-06	0.000225666
											-9.91667	2.62534e-06	0.000227118
											-9.88889	2.66598e-06	0.000228543
											-9.86111	2.70604e-06	0.000229939
											-9.83333	2.74551e-06	0.000231308
											-9.80556	2.78436e-06	0.000232648
											-9.77778	2.82258e-06	0.00023396
											-9.75	2.86015e-06	0.000235244
											-9.72222	2.89705e-06	0.0002365
											-9.69444	2.93328e-06	0.000237728
											-9.66667	2.96881e-06	0.000238928
											-9.63889	3.00365e-06	0.0002401
											-9.61111	3.03777e-06	0.000241244
											-9.58333	3.07118e-06	0.000242361
											-9.55556	3.10386e-06	0.000243451
											-9.52778	3.13582e-06	0.000244513
											-9.5	3.16704e-06	0.000245549
											-9.47222	3.19753e-06	0.000246558
											-9.44444	3.22728e-06	0.000247541
											-9.41667	3.25629e-06	0.000248498
											-9.38889	3.28457e-06	0.00024943
											-9.36111	3.31211e-06	0.000250336
											-9.33333	3.33892e-06	0.000251218
											-9.30556	3.365e-06	0.000252075
											-9.27778	3.39035e-06	0.000252907
											-9.25	3.41498e-06	0.000253716
											-9.22222	3.4389e-06	0.000254502
											-9.19444	3.46211e-06	0.000255264
											-9.16667	3.48462e-06	0.000256004
											-9.13889	3.50643e-06	0.000256722
											-9.11111	3.52757e-06	0.000257418
											-9.08333	3.54802e-06	0.000258093
											-9.05556	3.56781e-06	0.000258746
											-9.02778	3.58694e-06	0.000259379
											-9	3.60543e-06	0.000259992
											-8.97222	3.62328e-06	0.000260585
											-8.94444	3.6405e-06	0.000261159
											-8.91667	3.65712e-06	0.000261714
											-8.88889	3.67313e-06	0.00026225
											-8.86111	3.68855e-06	0.000262768
											-8.83333	3.7034e-06	0.000263269
											-8.80556	3.71768e-06	0.000263752
											-8.77778	3.73141e-06	0.000264218
											-8.75	3.74461e-06	0.000264668
											-8.72222	3.75727e-06	0.000265102
											-8.69444	3.76943e-06	0.00026552
											-8.66667	3.78109e-06	0.000265923
											-8.63889	3.79226e-06	0.000266311
											-8.61111	3.80296e-06	0.000266684
											-8.58333	3.8132e-06	0.000267044
											-8.55556	3.823e-06	0.000267389
											-8.52778	3.83236e-06	0.000267722
											-8.5	3.8413e-06	0.000268041
											-8.47222	3.84984e-06	0.000268348
											-8.44444	3.85799e-06	0.000268642
											-8.41667	3.86576e-06	0.000268925
											-8.38889	3.87315e-06	0.000269196
											-8.36111	3.8802e-06	0.000269456
											-8.33333	3.8869e-06	0.000269705
											-8.30556	3.89328e-06	0.000269943
											-8.27778	3.89933e-06	0.000270172
											-8.25	3.90508e-06	0.000270391
											-8.22222	3.91054e-06	0.0002706
											-8.19444	3.91572e-06	0.0002708
											-8.16667	3.92062e-06	0.000270991
											-8.13889	3.92527e-06	0.000271173
											-8.11111	3.92966e-06	0.000271347
											-8.08333	3.93382e-06	0.000271514
											-8.05556	3.93775e-06	0.000271672
											-8.02778	3.94146e-06	0.000271824
											-8	3.94496e-06	0.000271968
											-7.97222	3.94826e-06	0.000272105
											-7.94444	3.95137e-06	0.000272235
											-7.91667	3.9543e-06	0.00027236
											-7.88889	3.95706e-06	0.000272478
											-7.86111	3.95966e-06	0.00027259
											-7.83333	3.9621e-06	0.000272697
											-7.80556	3.96439e-06	0.000272798
											-7.77778	3.96654e-06	0.000272894
											-7.75	3.96855e-06	0.000272986
											-7.72222	3.97044e-06	0.000273072
											-7.69444	3.97221e-06	0.000273154
											-7.66667	3.97387e-06	0.000273232
											-7.63889	3.97542e-06	0.000273305
											-7.61111	3.97687e-06	0.000273375
											-7.58333	3.97822e-06	0.00027344
											-7.55556	3.97948e-06	0.000273502
											-7.52778	3.98066e-06	0.000273561
											-7.5	3.98176e-06	0.000273616
											-7.47222	3.98278e-06	0.000273669
											-7.44444	3.98373e-06	0.000273718
											-7.41667	3.98461e-06	0.000273765
											-7.38889	3.98543e-06	0.000273808
											-7.36111	3.9862e-06	0.00027385
											-7.33333	3.9869e-06	0.000273888
											-7.30556	3.98756e-06	0.000273925
											-7.27778	3.98817e-06	0.000273959
											-7.25	3.98873e-06	0.000273992
											-7.22222	3.98926e-06	0.000274022
											-7.19444	3.98974e-06	0.00027405
											-7.16667	3.99018e-06	0.000274077
											-7.13889	3.99059e-06	0.000274102
											-7.11111	3.99097e-06	0.000274126
											-7.08333	3.99132e-06	0.000274148
											-7.05556	3.99165e-06	0.000274168
											-7.02778	3.99194e-06	0.000274187
											-7	3.99222e-06	0.000274205
											-6.97222	3.99247e-06	0.000274222
											-6.94444	3.9927e-06	0.000274238
											-6.91667	3.99291e-06	0.000274253
											-6.88889	3.99311e-06	0.000274266
											-6.86111	3.99328e-06	0.000274279
											-6.83333	3.99345e-06	0.000274291
											-6.80556	3.9936e-06	0.000274302
											-6.77778	3.99373e-06	0.000274313
											-6.75	3.99386e-06	0.000274322
											-6.72222	3.99397e-06	0.000274331
											-6.69444	3.99408e-06	0.00027434
											-6.66667	3.99417e-06	0.000274347
											-6.63889	3.99426e-06	0.000274354
											-6.61111	3.99434e-06	0.000274361
											-6.58333	3.99441e-06	0.000274367
											-6.55556	3.99448e-06	0.000274373
											-6.52778	3.99454e-06	0.000274379
											-6.5	3.99459e-06	0.000274383
											-6.47222	3.99464e-06	0.000274388
											-6.44444	3.99468e-06	0.000274392
											-6.41667	3.99473e-06	0.000274396
											-6.38889	3.99476e-06	0.0002744
											-6.36111	3.9948e-06	0.000274403
											-6.33333	3.99483e-06	0.000274406
											-6.30556	3.99485e-06	0.000274409
											-6.27778	3.99488e-06	0.000274412
											-6.25	3.9949e-06	0.000274414
											-6.22222	3.99492e-06	0.000274417
											-6.19444	3.99494e-06	0.000274419
											-6.16667	3.99495e-06	0.000274421
											-6.13889	3.99497e-06	0.000274422
											-6.11111	3.99498e-06	0.000274424
											-6.08333	3.99499e-06	0.000274425
											-6.05556	3.995e-06	0.000274427
											-6.02778	3.99501e-06	0.000274428
											-6	3.99502e-06	0.000274429
											-5.97222	3.99503e-06	0.00027443
											-5.94444	3.99504e-06	0.000274431
											-5.91667	3.99504e-06	0.000274432
											-5.88889	3.99505e-06	0.000274433
											-5.86111	3.99505e-06	0.000274434
											-5.83333	3.99506e-06	0.000274434
											-5.80556	3.99506e-06	0.000274435
											-5.77778	3.99506e-06	0.000274436
											-5.75	3.99507e-06	0.000274436
											-5.72222	3.99507e-06	0.000274437
											-5.69444	3.99507e-06	0.000274437
											-5.66667	3.99508e-06	0.000274437
											-5.63889	3.99508e-06	0.000274438
											-5.61111	3.99508e-06	0.000274438
											-5.58333	3.99508e-06	0.000274438
											-5.55556	3.99508e-06	0.000274439
											-5.52778	3.99508e-06	0.000274439
											-5.5	3.99508e-06	0.000274439
											-5.47222	3.99509e-06	0.000274439
											-5.44444	3.99509e-06	0.00027444
											-5.41667	3.99509e-06	0.00027444
											-5.38889	3.99509e-06	0.00027444
											-5.36111	3.99509e-06	0.00027444
											-5.33333	3.99509e-06	0.00027444
											-5.30556	3.99509e-06	0.00027444
											-5.27778	3.99509e-06	0.00027444
											-5.25	3.99509e-06	0.000274441
											-5.22222	3.99509e-06	0.000274441
											-5.19444	3.99509e-06	0.000274441
											-5.16667	3.99509e-06	0.000274441
											-5.13889	3.99509e-06	0.000274441
											-5.11111	3.99509e-06	0.000274441
											-5.08333	3.99509e-06	0.000274441
											-5.05556	3.99509e-06	0.000274441
											-5.02778	3.99509e-06	0.000274441
											-5	3.99509e-06	0.000274441
											-4.97222	3.99509e-06	0.000274441
											-4.94444	3.99509e-06	0.000274441
											-4.91667	3.99509e-06	0.000274441
											-4.88889	3.99509e-06	0.000274441
											-4.86111	3.99509e-06	0.000274441
											-4.83333	3.99509e-06	0.000274441
											-4.80556	3.99509e-06	0.000274441
											-4.77778	3.99509e-06	0.000274441
											-4.75	3.99509e-06	0.000274441
											-4.72222	3.99509e-06	0.000274441
											-4.69444	3.99509e-06	0.000274441
											-4.66667	3.99509e-06	0.000274441
											-4.63889	3.99509e-06	0.000274441
											-4.61111	3.99509e-06	0.000274441
											-4.58333	3.99509e-06	0.000274441
											-4.55556	3.99509e-06	0.000274441
											-4.52778	3.99509e-06	0.000274441
											-4.5	3.99509e-06	0.000274441
											-4.47222	3.99509e-06	0.000274441
											-4.44444	3.99509e-06	0.000274441
											-4.41667	3.99509e-06	0.000274441
											-4.38889	3.99509e-06	0.000274441
											-4.36111	3.99509e-06	0.000274441
											-4.33333	3.99509e-06	0.000274441
											-4.30556	3.99509e-06	0.000274441
											-4.27778	3.99509e-06	0.000274441
											-4.25	3.99509e-06	0.000274441
											-4.22222	3.99509e-06	0.000274441
											-4.19444	3.99509e-06	0.000274441
											-4.16667	3.99509e-06	0.000274442
											-4.13889	3.99509e-06	0.000274442
											-4.11111	3.99509e-06	0.000274442
											-4.08333	3.99509e-06	0.000274442
											-4.05556	3.99509e-06	0.000274442
											-4.02778	3.99509e-06	0.000274442
											-4	3.99509e-06	0.000274442
											-3.97222	3.99509e-06	0.000274442
											-3.94444	3.99509e-06	0.000274442
											-3.91667	3.99509e-06	0.000274442
											-3.88889	3.99509e-06	0.000274442
											-3.86111	3.99509e-06	0.000274442
											-3.83333	3.99509e-06	0.000274442
											-3.80556	3.99509e-06	0.000274442
											-3.77778	3.99509e-06	0.000274442
											-3.75	3.99509e-06	0.000274442
											-3.72222	3.99509e-06	0.000274442
											-3.69444	3.99509e-06	0.000274442
											-3.66667	3.99509e-06	0.000274442
											-3.63889	3.99509e-06	0.000274442
											-3.61111	3.99509e-06	0.000274442
											-3.58333	3.99509e-06	0.000274442
											-3.55556	3.99509e-06	0.000274442
											-3.52778	3.99509e-06	0.000274442
											-3.5	3.99509e-06	0.000274442
											-3.47222	3.99509e-06	0.000274442
											-3.44444	3.99509e-06	0.000274442
											-3.41667	3.99509e-06	0.000274442
											-3.38889	3.99509e-06	0.000274442
											-3.36111	3.99509e-06	0.000274442
											-3.33333	3.99509e-06	0.000274442
											-3.30556	3.99509e-06	0.000274442
											-3.27778	3.99509e-06	0.000274442
											-3.25	3.99509e-06	0.000274442
											-3.22222	3.99509e-06	0.000274442
											-3.19444	3.99509e-06	0.000274442
											-3.16667	3.99509e-06	0.000274442
											-3.13889	3.99509e-06	0.000274442
											-3.11111	3.99509e-06	0.000274442
											-3.08333	3.99509e-06	0.000274442
											-3.05556	3.99509e-06	0.000274442
											-3.02778	3.99509e-06	0.000274442
											-3	3.99509e-06	0.000274442
											-2.97222	3.99509e-06	0.000274442
											-2.94444	3.99509e-06	0.000274442
											-2.91667	3.99509e-06	0.000274442
											-2.88889	3.99509e-06	0.000274442
											-2.86111	3.99509e-06	0.000274442
											-2.83333	3.99509e-06	0.000274442
											-2.80556	3.99509e-06	0.000274442
											-2.77778	3.99509e-06	0.000274442
											-2.75	3.99509e-06	0.000274442
											-2.72222	3.99509e-06	0.000274442
											-2.69444	3.99509e-06	0.000274442
											-2.66667	3.99509e-06	0.000274442
											-2.63889	3.99509e-06	0.000274442
											-2.61111	3.99509e-06	0.000274442
											-2.58333	3.99509e-06	0.000274442
											-2.55556	3.99509e-06	0.000274442
											-2.52778	3.99509e-06	0.000274442
											-2.5	3.99509e-06	0.000274442
											-2.47222	3.99509e-06	0.000274442
											-2.44444	3.99509e-06	0.000274442
											-2.41667	3.99509e-06	0.000274442
											-2.38889	3.99509e-06	0.000274442
											-2.36111	3.99509e-06	0.000274442
											-2.33333	3.99509e-06	0.000274442
											-2.30556	3.99509e-06	0.000274442
											-2.27778	3.99509e-06	0.000274442
											-2.25	3.99509e-06	0.000274442
											-2.22222	3.99509e-06	0.000274442
											-2.19444	3.99509e-06	0.000274442
											-2.16667	3.99509e-06	0.000274442
											-2.13889	3.99509e-06	0.000274442
											-2.11111	3.99509e-06	0.000274442
											-2.08333	3.99509e-06	0.000274442
											-2.05556	3.99509e-06	0.000274442
											-2.02778	3.99509e-06	0.000274442
											-2	3.99509e-06	0.000274442
											-1.97222	3.99509e-06	0.000274442
											-1.94444	3.99509e-06	0.000274442
											-1.91667	3.99509e-06	0.000274442
											-1.88889	3.99509e-06	0.000274442
											-1.86111	3.99509e-06	0.000274442
											-1.83333	3.99509e-06	0.000274442
											-1.80556	3.99509e-06	0.000274442
											-1.77778	3.99509e-06	0.000274442
											-1.75	3.99509e-06	0.000274442
											-1.72222	3.99509e-06	0.000274442
											-1.69444	3.99509e-06	0.000274442
											-1.66667	3.99509e-06	0.000274442
											-1.63889	3.99509e-06	0.000274442
											-1.61111	3.99509e-06	0.000274442
											-1.58333	3.99509e-06	0.000274442
											-1.55556	3.99509e-06	0.000274442
											-1.52778	3.99509e-06	0.000274442
											-1.5	3.99509e-06	0.000274442
											-1.47222	3.99509e-06	0.000274442
											-1.44444	3.99509e-06	0.000274442
											-1.41667	3.99509e-06	0.000274442
											-1.38889	3.99509e-06	0.000274442
											-1.36111	3.99509e-06	0.000274442
											-1.33333	3.99509e-06	0.000274442
											-1.30556	3.99509e-06	0.000274442
											-1.27778	3.99509e-06	0.000274442
											-1.25	3.99509e-06	0.000274442
											-1.22222	3.99509e-06	0.000274442
											-1.19444	3.99509e-06	0.000274442
											-1.16667	3.99509e-06	0.000274442
											-1.13889	3.99509e-06	0.000274442
											-1.11111	3.99509e-06	0.000274442
											-1.08333	3.99509e-06	0.000274442
											-1.05556	3.99509e-06	0.000274442
											-1.02778	3.99509e-06	0.000274442
											-1	3.99509e-06	0.000274442
											-0.97222	3.99509e-06	0.000274442
											-0.94444	3.99509e-06	0.000274442
											-0.91667	3.99509e-06	0.000274442
											-0.88889	3.99509e-06	0.000274442
											-0.86111	3.99509e-06	0.000274442
											-0.83333	3.99509e-06	0.000274442
											-0.80556	3.99509e-06	0.000274442
											-0.77778	3.99509e-06	0.000274442
											-0.75	3.99509e-06	0.000274442
											-0.72222	3.99509e-06	0.000274442
											-0.69444	3.99509e-06	0.000274442
											-0.66667	3.99509e-06	0.000274442
											-0.63889	3.99509e-06	0.000274442
											-0.61111	3.99509e-06	0.000274442
											-0.58333	3.99509e-06	0.000274442
											-0.55556	3.99509e-06	0.000274442
											-0.52778	3.99509e-06	0.000274442
											-0.5	3.99509e-06	0.000274442
											-0.47222	3.99509e-06	0.000274442
											-0.44444	3.99509e-06	0.000274442
											-0.41667	3.99509e-06	0.000274442
											-0.38889	3.99509e-06	0.000274442
											-0.36111	3.99509e-06	0.000274442
											-0.33333	3.99509e-06	0.000274442
											-0.30556	3.99509e-06	0.000274442
											-0.27778	3.99509e-06	0.000274442
											-0.25	3.99509e-06	0.000274442
											-0.22222	3.99509e-06	0.000274442
											-0.19444	3.99509e-06	0.000274442
											-0.16667	3.99509e-06	0.000274442
											-0.13889	3.99509e-06	0.000274442
											-0.11111	3.99509e-06	0.000274442
											-0.08333	3.99509e-06	0.000274442
											-0.05556	3.99509e-06	0.000274442
											-0.02778	3.99509e-06	0.000274442
