# Supplementary material for: The importance of acid-processed meteoric smoke relative to meteoric fragments for crystal nucleation in polar stratospheric clouds
Source: Copernicus journal article supplement (doi:10.5194/acp-23-2215-2023), 2023-02-14
Supplement: Supplementary file 2 [file acp-23-2215-2023-supplement.zip]

Archive with 2 entries (2 files):
- acp-23-2215-2023-supplement-title-page.pdf
- Figure data for James meteoric material PSC.xlsx
